# Supplementary material for: S-scheme heterojunction AgCl/g-C3N4 with a unique electron transfer channel via a built-in electric field for enhanced H2 production
Source: Royal Society of Chemistry journal article supplement (doi:10.1039/d2se00916a), 2022-01-01
Supplement: d2se00916a1.pdf [file d2se00916a1.pdf]

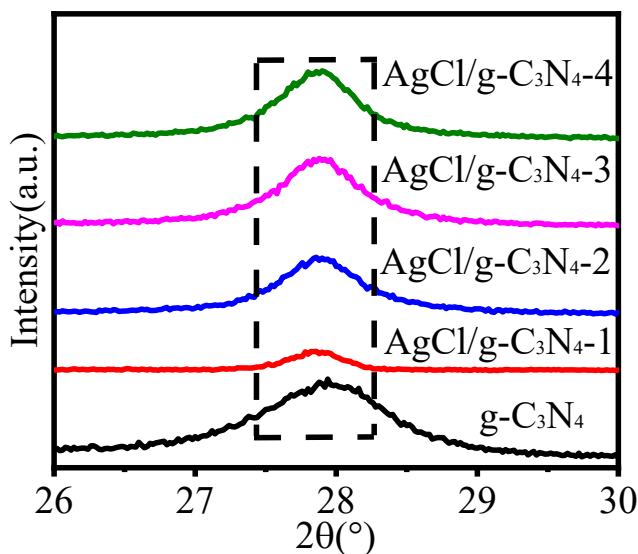

S1 the Partial enlarged view of Powder XRD patterns about AgCl/g-C<sub>3</sub>N<sub>4</sub>  
and g-C<sub>3</sub>N<sub>4</sub>

Table1 Specific surface area, pore size, and pore volume of the different  
photocatalysts.

| Catalysts                               | S <sub>BET</sub> (m <sup>2</sup> /g) | D <sub>pore</sub> (nm) | V <sub>pore</sub> (cm <sup>3</sup> /g) |
|-----------------------------------------|--------------------------------------|------------------------|----------------------------------------|
| g-C <sub>3</sub> N <sub>4</sub>         | 41.321                               | 3.417                  | 0.073                                  |
| AgCl/g-C <sub>3</sub> N <sub>4</sub> -3 | 49.356                               | 3.235                  | 0.087                                  |

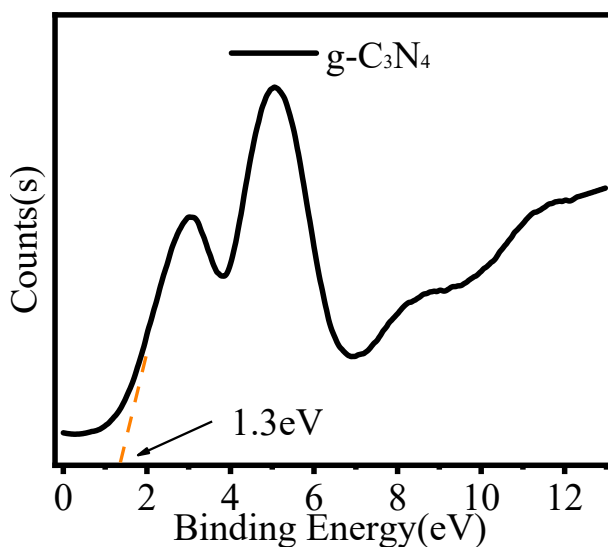

S2 the Valence Band XPS spectra of g-C<sub>3</sub>N<sub>4</sub>.

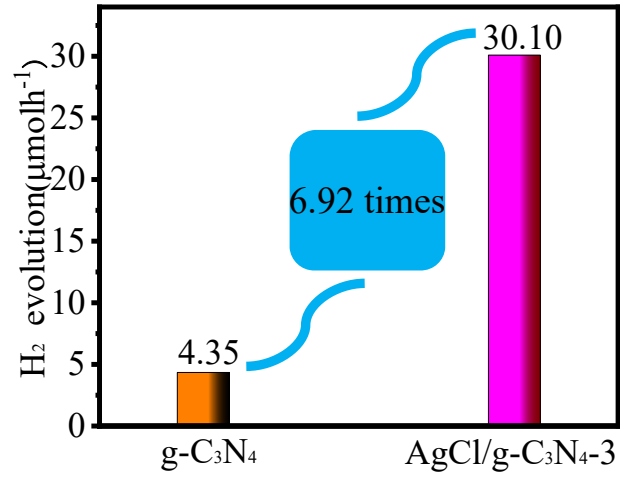

S3 Photocatalytic HER activities over different catalysts.
